# Supplementary material for: Non-invasive Raman spectroscopy for time-resolved in-line lipidomics
Source: Royal Society of Chemistry journal article supplement (doi:10.1039/d1ra04254h), 2021-01-01
Supplement: d1ra04254h1.pdf [file d1ra04254h1.pdf]

## Electronic Supplementary Information

### Non-invasive Raman spectroscopy for time-resolved in-line lipidomics

Karin Wieland <sup>a,b</sup>, Mahmoud Masri <sup>c</sup>, Jeremy von Poschinger <sup>d</sup>, Thomas Brück <sup>d</sup> and Christoph Haisch <sup>\*a</sup>

<sup>a</sup> Chair of Analytical Chemistry, Technical University of Munich, Elisabeth-Winterhalter-Weg 6, 81377 Germany; [karin.wieland@tum.de](mailto:karin.wieland@tum.de), [haisch@tum.de](mailto:haisch@tum.de)

<sup>b</sup> Competence Center CHASE GmbH, Altenbergerstraße 69, 4040 Linz, Austria.

<sup>c</sup> Werner Siemens-Chair of Synthetic Biotechnology, Technical University of Munich, Lichtenbergstr. 4, 85748 Garching, Germany; [mahmoud.masri@tum.de](mailto:mahmoud.masri@tum.de), [brueck@tum.de](mailto:brueck@tum.de)

<sup>d</sup> TUM Pilot Plant for Industrial Biotechnology, Ernst-Otto-Fischerstrasse 3, 85748 Garching, Germany; [jeremy.poschinger@tum.de](mailto:jeremy.poschinger@tum.de)

#### 1. Off-line single-cell lipidomics

Representative Raman spectra of each cluster within single yeast cells are depicted in figure S1. Solid line represents the mean spectrum, the standard deviation is shown as shaded area.

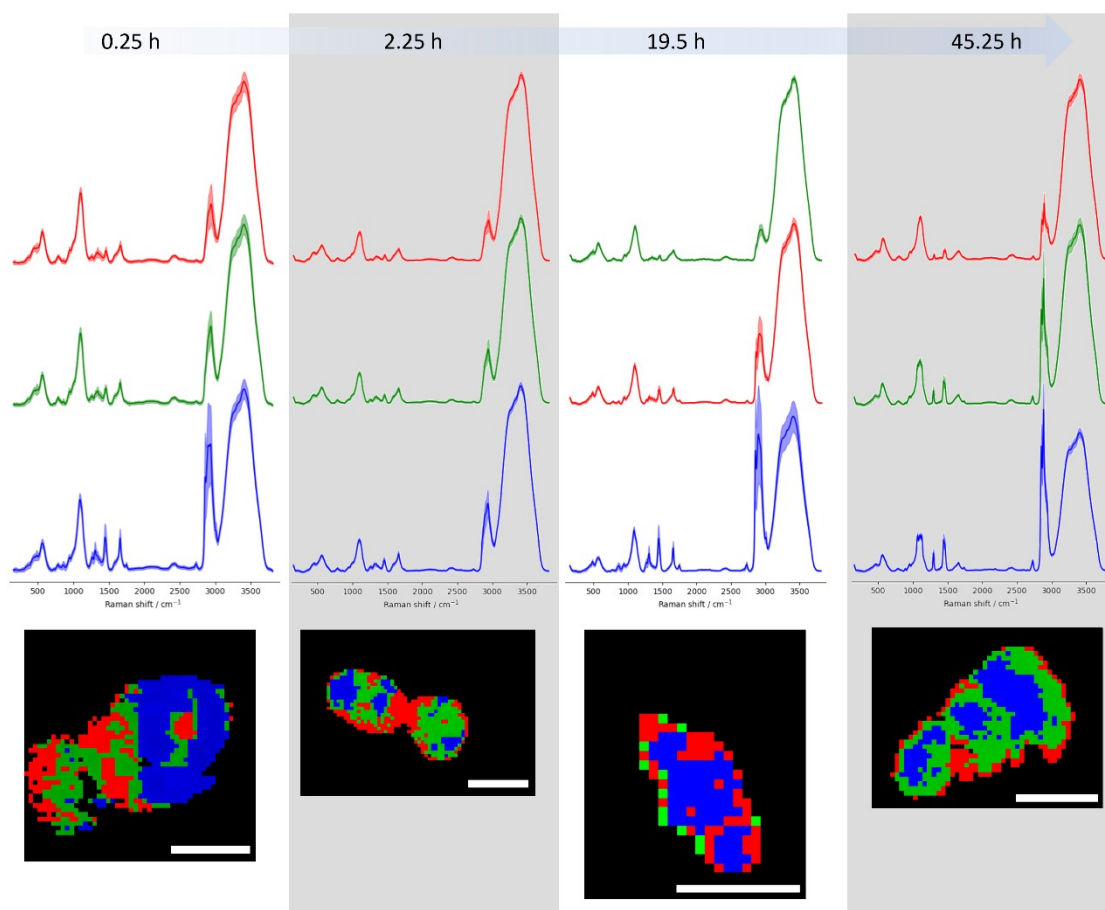

Figure S1. Representative Raman spectra (mean and single standard deviation) of each cluster within single yeast cells drawn at different time points (0.25, 2.25, 19.5, and 45.25 h). Spectra are color-coded according to the false color image of the yeast cell. Spectra are stacked such that the =C-H/CH ratio decreases from top to bottom. Scalebar is 5 μm.
